# Supplementary material
Source: PubMed Central journal article supplement (PMC5656526)

# Supplementary Figure 1: LOESS Fits for Change from Baseline to Week 48 Parameters within Vitamin D/Calcium Arm

LOESS Fits for Change from Baseline to Week 48 in Total 25OHD on BMD at Hip by Race (Vitamin D/Calcium Group)

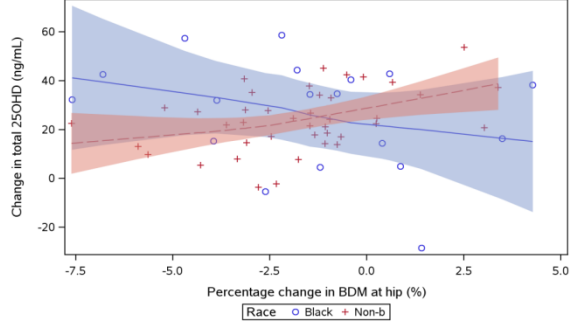

LOESS Fits for Change from Baseline to Week 48 in Bioavailable 25OHD on BMD at Hip by Race (Vitamin D/Calcium Group)

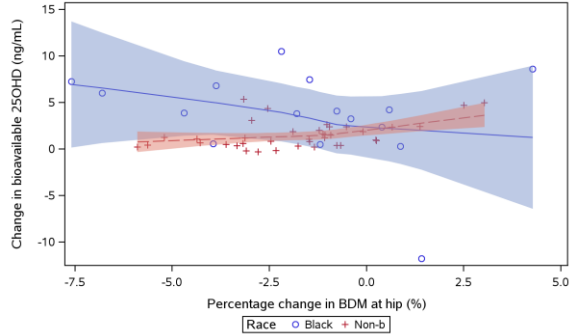

LOESS Fits for Change from Baseline to Week 48 in Total 25OHD on P1NP by Race (Vitamin D/Calcium Group)

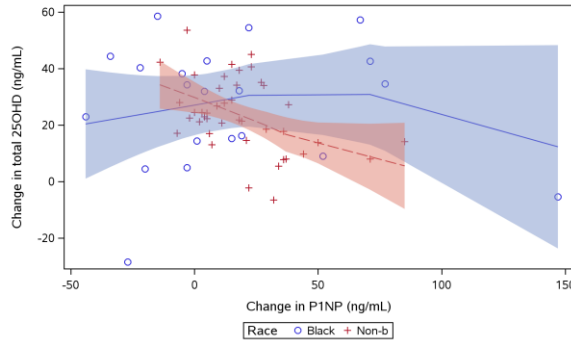

LOESS Fits for Change from Baseline to Week 48 in Bioavailable 25OHD on P1NP by Race (Vitamin D/Calcium Group)

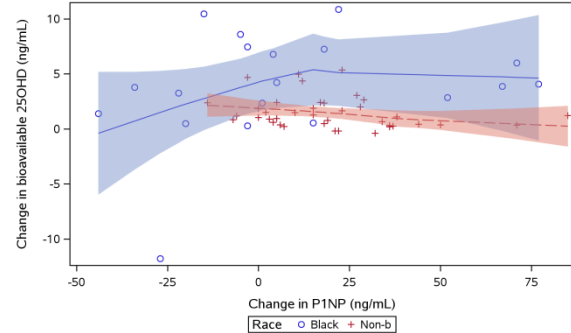

LOESS Fits for Change from Baseline to Week 48 in Total 25OHD on CTX by Race (Vitamin D/Calcium Group)

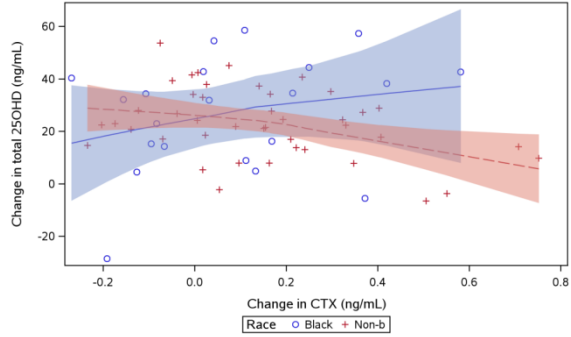

LOESS Fits for Change from Baseline to Week 48 in Bioavailable 25OHD on CTX by Race (Vitamin D/Calcium Group)

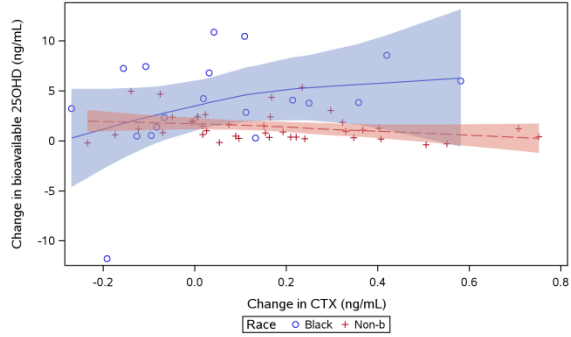

Supplement: NIHMS905463-supplement-Supplementary_Figure_1.pdf [file NIHMS905463-supplement-Supplementary_Figure_1.pdf]
